# Supplementary material for: Salvage Treatment for Progressive Brain Metastases in Breast Cancer
Source: MDPI journal article supplement (doi:10.3390/cancers14041096), 2022-02-21
Supplement: s1 [file s1]

# Salvage Treatment for Progressive Brain Metastases in Breast Cancer

Mateusz Jacek Spalek <sup>1,\*</sup> and Tomasz Mandat <sup>2</sup>**Table S1.** Methods of salvage treatment in breast cancer brain metastases – analysis of available data and the quality of evidence.

| Publication                                                                                                                                                                                                                                                                                    | Type of study              | Group who received salvage treatment for brain metastases | Previous therapy for breast cancer brain metastases                 | Intervention              | Oxford Centre for Evidence-Based Medicine Level of Evidence (1 - high; 2 - moderate; 3-5 - low) |
|------------------------------------------------------------------------------------------------------------------------------------------------------------------------------------------------------------------------------------------------------------------------------------------------|----------------------------|-----------------------------------------------------------|---------------------------------------------------------------------|---------------------------|-------------------------------------------------------------------------------------------------|
| Combs SE, Schulz-Ertner D, Thilmann C, Edler L, Debus J. Treatment of cerebral metastases from breast cancer with stereotactic radiosurgery. <i>Strahlenther Onkol.</i> 2004 Sep;180(9):590-6. doi: 10.1007/s00066-004-1299-x. PMID: 15378190.                                                 | Retrospective cohort study | Breast cancer only ( <i>n</i> = 39)                       | Whole brain radiotherapy                                            | Stereotactic radiosurgery | 2b                                                                                              |
| Akyurek S, Chang EL, Mahajan A, Hassenbusch SJ, Allen PK, Mathews LA, Shiu AS, Maor MH, Woo SY. Stereotactic radiosurgical treatment of cerebral metastases arising from breast cancer. <i>Am J Clin Oncol.</i> 2007 Jun;30(3):310-4. doi: 10.1097/01.coc.0000258365.50975.f6. PMID: 17551311. | Retrospective cohort study | Breast cancer only ( <i>n</i> = 15)                       | Whole brain radiotherapy                                            | Stereotactic radiosurgery | 2b                                                                                              |
| Kased N, Binder DK, McDermott MW, Nakamura JL, Huang K, Berger MS, Wara WM, Sneed PK. Gamma Knife radiosurgery for brain metastases from primary breast cancer. <i>Int J</i>                                                                                                                   | Retrospective cohort study | Breast cancer only ( <i>n</i> = 103)                      | Whole brain radiotherapy ( <i>n</i> = 81); whole brain radiotherapy | Stereotactic radiosurgery | 2b                                                                                              |

|                                                                                                                                                                                                                                                                                                                                                                            |                                       |                                                                    |                                                                                                                                                                                                                  |                                                                                                               |    |
|----------------------------------------------------------------------------------------------------------------------------------------------------------------------------------------------------------------------------------------------------------------------------------------------------------------------------------------------------------------------------|---------------------------------------|--------------------------------------------------------------------|------------------------------------------------------------------------------------------------------------------------------------------------------------------------------------------------------------------|---------------------------------------------------------------------------------------------------------------|----|
| Radiat Oncol Biol Phys. 2009 Nov 15;75(4):1132-40. doi: 10.1016/j.ijrobp.2008.12.031. Epub 2009 Apr 3. PMID: 19345514.                                                                                                                                                                                                                                                     |                                       |                                                                    | and surgery ( <i>n</i> = 18); surgery alone ( <i>n</i> = 4)                                                                                                                                                      |                                                                                                               |    |
| Kelly PJ, Lin NU, Claus EB, Quant EC, Weiss SE, Alexander BM. Salvage stereotactic radiosurgery for breast cancer brain metastases: outcomes and prognostic factors. Cancer. 2012 Apr 15;118(8):2014-20. doi: 10.1002/cncr.26343. Epub 2011 Sep 14. PMID: 21918959.                                                                                                        | Retrospective cohort study            | Breast cancer only ( <i>n</i> = 79)                                | Whole brain radiotherapy ( <i>n</i> = 63); whole brain radiotherapy and surgery ( <i>n</i> = 13); surgery alone ( <i>n</i> = 1); total meningeal irradiation ( <i>n</i> = 1); systemic treatment ( <i>n</i> = 1) | Stereotactic radiosurgery                                                                                     | 2b |
| Huang Z, Sun B, Shen G, Cha L, Meng X, Wang J, Zhou Z, Wu S. Brain metastasis reirradiation in patients with advanced breast cancer. J Radiat Res. 2017 Jan;58(1):142-148. doi: 10.1093/jrr/rrw087. Epub 2016 Oct 5. PMID: 27707842; PMCID: PMC5321192.                                                                                                                    | Retrospective cohort study            | Breast cancer only ( <i>n</i> = 56)                                | Whole brain radiotherapy ( <i>n</i> = 39); stereotactic radiosurgery ( <i>n</i> = 17)                                                                                                                            | Stereotactic radiosurgery after whole brain radiotherapy; whole brain radiotherapy after stereotactic surgery | 2b |
| Lai, S. & Huang, C. & Wang, C. & Chen, Yitian & Lan, K. & Cheng, A. & Kuo, S.. (2013). Brain Re-irradiation for Breast Cancer Patients With Brain Metastasis After Whole Brain Radiation Therapy: Effect of Epidermal Growth Factor Receptor-2 Status on Clinical Outcome. International Journal of Radiation Oncology*Biophysics. 87. S243. 10.1016/j.ijrobp.2013.06.632. | Retrospective cohort study            | Breast cancer only ( <i>n</i> = 40)                                | Whole brain radiotherapy                                                                                                                                                                                         | Stereotactic radiosurgery; fractionated stereotactic radiotherapy; repeated whole brain radiotherapy          | 2b |
| Kano H, Kondziolka D, Zorro O, Lobato-Polo J, Flickinger JC, Lunsford LD. The results of resection after stereotactic radiosurgery for brain                                                                                                                                                                                                                               | Retrospective cohort study (subgroup) | Various cancers including <i>n</i> = 9 patients with breast cancer | Stereotactic radiosurgery                                                                                                                                                                                        | Resection                                                                                                     | 4  |

|                                                                                                                                                                                                                                                                                                                                                                                                                                |                                        |                                                               |                           |                                                      |   |  |
|--------------------------------------------------------------------------------------------------------------------------------------------------------------------------------------------------------------------------------------------------------------------------------------------------------------------------------------------------------------------------------------------------------------------------------|----------------------------------------|---------------------------------------------------------------|---------------------------|------------------------------------------------------|---|--|
| metastases. J Neurosurg. 2009 Oct;111(4):825-31. doi: 10.3171/2009.4.JNS09246. PMID: 19425892.                                                                                                                                                                                                                                                                                                                                 |                                        |                                                               |                           |                                                      |   |  |
| Truong MT, St Clair EG, Donahue BR, Rush SC, Miller DC, Formenti SC, Knopp EA, Han K, Golfinos JG. Results of surgical resection for progression of brain metastases previously treated by gamma knife radiosurgery. Neurosurgery. 2006 Jul;59(1):86-97; discussion 86-97. doi: 10.1227/01.NEU.0000219858.80351.38. PMID: 16823304.                                                                                            | Retrospective cohort study (sub-group) | Various cancers including $n = 4$ patients with breast cancer | Stereotactic radiosurgery | Resection                                            | 4 |  |
| Mitsuya K, Nakasu Y, Hayashi N, Deguchi S, Oishi T, Sugino T, Yasui K, Ogawa H, Onoe T, Asakura H, Harada H. Retrospective analysis of salvage surgery for local progression of brain metastasis previously treated with stereotactic irradiation: diagnostic contribution, functional outcome, and prognostic factors. BMC Cancer. 2020 Apr 17;20(1):331. doi: 10.1186/s12885-020-06800-w. PMID: 32303195; PMCID: PMC7165413. | Retrospective cohort study (sub-group) | Various cancers including $n = 9$ patients with breast cancer | Stereotactic radiosurgery | Resection with or without postoperative radiotherapy | 4 |  |
| McKay WH, McTyre ER, Okoukoni C, Alphonse-Sullivan NK, Ruiz J, Munley MT, Qasem S, Lo HW, Xing F, Laxton AW, Tatter SB, Watabe K, Chan MD. Repeat stereotactic radiosurgery as salvage therapy for locally recurrent brain metastases previously treated with radiosurgery. J Neurosurg. 2017 Jul;127(1):148-156. doi: 10.3171/2016.5.JNS153051. Epub 2016 Aug 5. PMID: 27494815.                                              | Retrospective cohort study (sub-group) | Various cancers including $n = 9$ patients with breast cancer | Stereotactic radiosurgery | Stereotactic radiosurgery                            | 4 |  |

|                                                                                                                                                                                                                                                                                                                                     |                                                              |                                                                |                             |                                                                                                         |    |
|-------------------------------------------------------------------------------------------------------------------------------------------------------------------------------------------------------------------------------------------------------------------------------------------------------------------------------------|--------------------------------------------------------------|----------------------------------------------------------------|-----------------------------|---------------------------------------------------------------------------------------------------------|----|
| Rana N, Pendyala P, Cleary RK, Luo G, Zhao Z, Chambless LB, Cmelak AJ, Attia A, Stavas MJ. Long-term Outcomes after Salvage Stereotactic Radiosurgery (SRS) following In-Field Failure of Initial SRS for Brain Metastases. <i>Front Oncol.</i> 2017 Nov 23;7:279. doi: 10.3389/fonc.2017.00279. PMID: 29218301; PMCID: PMC5703829. | Retrospective cohort study (sub-group)                       | Various cancers including $n = 5$ patients with breast cancer  | Stereotactic radiosurgery   | Stereotactic radiosurgery                                                                               | 4  |
| Lucia F, Touati R, Crainic N, Dissaux G, Pradier O, Bourbonne V, Schick U. Efficacy and Safety of a Second Course of Stereotactic Radiation Therapy for Locally Recurrent Brain Metastases: A Systematic Review. <i>Cancers (Basel)</i> . 2021 Sep 30;13(19):4929. doi: 10.3390/cancers13194929. PMID: 34638412; PMCID: PMC8508410. | Systematic review of cohort studies                          | Various cancers including $n = 61$ patients with breast cancer | Stereotactic radiosurgery   | Stereotactic radiosurgery                                                                               | 2a |
| Guo, S.; Reddy, C.A.; Chao, S.T.; Suh, J.H. Repeat Whole Brain Irradiation for Patients with Brain Metastases. <i>International Journal of Radiation Oncology, Biology, Physics</i> 2011, 81, S645, doi:10.1016/j.ijrobp.2011.06.1906.                                                                                              | Retrospective cohort study (sub-group)                       | Various cancers including $n = 8$ patients with breast cancer  | Whole brain radiotherapy    | Whole brain radiotherapy                                                                                | 4  |
| Boogerd W, Dalesio O, Bais EM, van der Sande JJ. Response of brain metastases from breast cancer to systemic chemotherapy. <i>Cancer</i> . 1992 Feb 15;69(4):972-80. doi: 10.1002/1097-0142(19920215)69:4<972::aid-cnrcr2820690423>3.0.co;2-p. PMID: 1735089.                                                                       | Retrospective cohort study (sub-group)                       | Breast cancer ( $n = 9$ )                                      | Surgery and/or radiotherapy | Cyclophosphamide, methotrexate, and 5-fluorouracil or cyclophosphamide, doxorubicin, and 5-fluorouracil | 4  |
| Christodoulou C, Bafaloukos D, Linardou H, Aravantinos G, Bamias A, Carina M, Klouvas G, Skarlos D; Hellenic Cooperative Oncology                                                                                                                                                                                                   | Prospective non-randomized phase 2 clinical trial (subgroup) | Various cancers including $n = 15$ patients with breast cancer | Any form of local treatment | Temozolomide                                                                                            | 2b |

|                                                                                                                                                                                                                                                                                                                                                                                        |                                                                     |                                            |                                                                         |                                      |           |  |
|----------------------------------------------------------------------------------------------------------------------------------------------------------------------------------------------------------------------------------------------------------------------------------------------------------------------------------------------------------------------------------------|---------------------------------------------------------------------|--------------------------------------------|-------------------------------------------------------------------------|--------------------------------------|-----------|--|
| <p>Group. Temozolomide (TMZ) combined with cisplatin (CDDP) in patients with brain metastases from solid tumors: a Hellenic Cooperative Oncology Group (HeCOG) Phase II study. <i>J Neurooncol.</i> 2005 Jan;71(1):61-5. doi: 10.1007/s11060-004-9176-0. PMID: 15719277.</p>                                                                                                           |                                                                     |                                            |                                                                         |                                      |           |  |
| <p>Rivera E, Meyers C, Groves M, Valero V, Francis D, Arun B, Broglio K, Yin G, Hortobagyi GN, Buchholz T. Phase I study of capecitabine in combination with temozolomide in the treatment of patients with brain metastases from breast carcinoma. <i>Cancer.</i> 2006 Sep 15;107(6):1348-54. doi: 10.1002/cncr.22127. PMID: 16909414.</p>                                            | <p>Prospective non-randomized phase 2 clinical trial (subgroup)</p> | <p>Breast cancer (<math>n = 10</math>)</p> | <p>Any form of local treatment</p>                                      | <p>Temozolomide and capecitabine</p> | <p>2b</p> |  |
| <p>Berghoff AS, Sax C, Klein M, Furtner J, Dieckmann K, Gatterbauer B, Widhalm G, Rudas M, Zielinski CC, Bartsch R, Preusser M. Alleviation of brain edema and restoration of functional independence by bevacizumab in brain-metastatic breast cancer: a case report. <i>Breast Care (Basel).</i> 2014 May;9(2):134-6. doi: 10.1159/000360930. PMID: 24944558; PMCID: PMC4038309.</p> | <p>Case report</p>                                                  | <p>Breast cancer</p>                       | <p>Surgery, stereotactic radio-surgery and whole brain radiotherapy</p> | <p>Bevacizumab</p>                   | <p>4</p>  |  |
| <p>Berghoff AS, Breckwoldt MO, Riedemann L, Karimian-Jazi K, Loew S, Schlieter F, Furtner J, Cinci M, Thomas M, Strowitzki MJ, Marmé F, Michel LL, Schmidt T, Jäger D, Bendszus M, Preusser M, Wick W, Winkler F. Bevacizumab-based treatment as salvage therapy in patients with recurrent symptomatic brain metastases. <i>Neurooncol Adv.</i> 2020 Mar 16;2(1):vdaa038. doi:</p>    | <p>Retrospective cohort study</p>                                   | <p>Breast cancer (<math>n = 22</math>)</p> | <p>Any form of local treatment</p>                                      | <p>Bevacizumab</p>                   | <p>2b</p> |  |

|                                                                                                                                                                                                                                                                                                                                                                                                                                                                                                                                                                   |                                                    |                             |                             |                                                                        |    |  |
|-------------------------------------------------------------------------------------------------------------------------------------------------------------------------------------------------------------------------------------------------------------------------------------------------------------------------------------------------------------------------------------------------------------------------------------------------------------------------------------------------------------------------------------------------------------------|----------------------------------------------------|-----------------------------|-----------------------------|------------------------------------------------------------------------|----|--|
| 10.1093/noajnl/vdaa038. PMID: 32642693; PMCID: PMC7212911.                                                                                                                                                                                                                                                                                                                                                                                                                                                                                                        |                                                    |                             |                             |                                                                        |    |  |
| Brenner, A.J.; Pandey, R.; Chiou, J.; Floyd, J.; Garcia, M.; Surapaneni, P.; Kaklamani, V.; Lathrop, K.; Crownover, R.; Caron, J.L.; et al. 373MO Delivery and Activity of SN-38 by Sacituzumab Govitecan in CNS Tumours. <i>Annals of Oncology</i> 2020, 31, S401, doi:10.1016/j.annonc.2020.08.482.                                                                                                                                                                                                                                                             | Prospective single arm window of opportunity trial | Breast cancer ( $n = 7$ )   | Any form of local treatment | Sacituzumab govitecan                                                  | 2b |  |
| Anders C, Deal AM, Abramson V, Liu MC, Storniolo AM, Carpenter JT, Puhalla S, Nanda R, Melhem-Bertrandt A, Lin NU, Kelly Marcom P, Van Poznak C, Stearns V, Melisko M, Smith JK, Karginova O, Parker J, Berg J, Winer EP, Peterman A, Prat A, Perou CM, Wolff AC, Carey LA. TBCRC 018: phase II study of iniparib in combination with irinotecan to treat progressive triple negative breast cancer brain metastases. <i>Breast Cancer Res Treat.</i> 2014 Aug;146(3):557-66. doi: 10.1007/s10549-014-3039-y. Epub 2014 Jul 8. PMID: 25001612; PMCID: PMC4112043. | Prospective non-randomized phase 2 clinical trial  | Breast cancer ( $n = 37$ )  | Any form of local treatment | Iniparib and irinotecan                                                | 2b |  |
| Lin NU, Borges V, Anders C, Murthy RK, Paplomata E, Hamilton E, Hurvitz S, Loi S, Okines A, Abramson V, Bedard PL, Oliveira M, Mueller V, Zelnak A, DiGiovanna MP, Bachelot T, Chien AJ, O'Regan R, Wardley A, Conlin A, Cameron D, Carey L, Curigliano G, Gelmon K, Loibl S, Mayor J, McGoldrick S, An X, Winer EP. Intracranial Efficacy and Survival With Tucatinib Plus Trastuzumab and Capecitabine for                                                                                                                                                      | Prospective randomized controlled trial            | Breast cancer ( $n = 108$ ) | Any form of treatment       | Tucatinib or placebo, in combination with trastuzumab and capecitabine | 1b |  |

|                                                                                                                                                                                                                                                                                                                                                                                                                                                                               |                                                   |                             |                              |                                                   |    |  |
|-------------------------------------------------------------------------------------------------------------------------------------------------------------------------------------------------------------------------------------------------------------------------------------------------------------------------------------------------------------------------------------------------------------------------------------------------------------------------------|---------------------------------------------------|-----------------------------|------------------------------|---------------------------------------------------|----|--|
| Previously Treated HER2-Positive Breast Cancer With Brain Metastases in the HER2CLIMB Trial. J Clin Oncol. 2020 Aug 10;38(23):2610-2619. doi: 10.1200/JCO.20.00775. Epub 2020 May 29. PMID: 32468955; PMCID: PMC7403000.                                                                                                                                                                                                                                                      |                                                   |                             |                              |                                                   |    |  |
| Lin NU, Diéras V, Paul D, Lossignol D, Christodoulou C, Stemmler HJ, Roché H, Liu MC, Greil R, Ciruelos E, Loibl S, Gori S, Wardley A, Yardley D, Brufsky A, Blum JL, Rubin SD, Dharan B, Stepkowski K, Zembryki D, Oliva C, Roychowdhury D, Paoletti P, Winer EP. Multicenter phase II study of lapatinib in patients with brain metastases from HER2-positive breast cancer. Clin Cancer Res. 2009 Feb 15;15(4):1452-9. doi: 10.1158/1078-0432.CCR-08-1080. PMID: 19228746. | Prospective non-randomized phase 2 clinical trial | Breast cancer ( $n = 242$ ) | Radiotherapy and trastuzumab | Lapatinib                                         | 2b |  |
| Morikawa A, de Stanchina E, Pentsova E, Kemeny MM, Li BT, Tang K, Patil S, Fleisher M, Van Poznak C, Norton L, Seidman AD. Phase I Study of Intermittent High-Dose Lapatinib Alternating with Capecitabine for HER2-Positive Breast Cancer Patients with Central Nervous System Metastases. Clin Cancer Res. 2019 Jul 1;25(13):3784-3792. doi: 10.1158/1078-0432.CCR-18-3502. Epub 2019 Apr 15. PMID: 30988080; PMCID: PMC6773251.                                            | Prospective phase 1 clinical trial                | Breast cancer               | Any form of treatment        | High dose lapatinib alternating with capecitabine | 2b |  |
| Freedman RA, Gelman RS, Anders CK, Melisko ME, Parsons HA, Cropp AM, Silvestri K, Cotter CM, Componeschi KP, Marte JM, Connolly RM, Moy B, Van Poznak CH, Blackwell KL, Puhalla SL, Jankowitz                                                                                                                                                                                                                                                                                 | Prospective non-randomized phase 2 clinical trial | Breast cancer ( $n = 49$ )  | Any form of treatment        | Neratinib                                         | 2b |  |

|                                                                                                                                                                                                                                                                                                                                                                                                                                                                                                        |                                                   |                        |                         |                                      |    |  |
|--------------------------------------------------------------------------------------------------------------------------------------------------------------------------------------------------------------------------------------------------------------------------------------------------------------------------------------------------------------------------------------------------------------------------------------------------------------------------------------------------------|---------------------------------------------------|------------------------|-------------------------|--------------------------------------|----|--|
| RC, Smith KL, Ibrahim N, Moynihan TJ, O'Sullivan CC, Nangia J, Niravath P, Tung N, Pohlmann PR, Burns R, Rimawi MF, Krop IE, Wolff AC, Winer EP, Lin NU; Translational Breast Cancer Research Consortium. TBCRC 022: A Phase II Trial of Neratinib and Capecitabine for Patients With Human Epidermal Growth Factor Receptor 2-Positive Breast Cancer and Brain Metastases. J Clin Oncol. 2019 May 1;37(13):1081-1089. doi: 10.1200/JCO.18.01511. Epub 2019 Mar 12. PMID: 30860945; PMCID: PMC6494354. |                                                   |                        |                         |                                      |    |  |
| Lin NU, Pegram M, Sahebjam S, Ibrahim N, Fung A, Cheng A, Nicholas A, Kirschbrown W, Kumthekar P. Pertuzumab Plus High-Dose Trastuzumab in Patients With Progressive Brain Metastases and HER2-Positive Metastatic Breast Cancer: Primary Analysis of a Phase II Study. J Clin Oncol. 2021 Aug 20;39(24):2667-2675. doi: 10.1200/JCO.20.02822. Epub 2021 May 4. PMID: 33945296; PMCID: PMC8376355.                                                                                                     | Prospective non-randomized phase 2 clinical trial | Breast cancer (n = 39) | Radiotherapy            | Pertuzumab and high-dose trastuzumab | 2b |  |
| Stewart DJ, Dahrouge S. Response of brain metastases from breast cancer to megestrol acetate: a case report. J Neurooncol. 1995;24(3):299-301. doi: 10.1007/BF01052847. PMID: 7595761.                                                                                                                                                                                                                                                                                                                 | Case report                                       | Breast cancer          | Resection, radiotherapy | Megestrol acetate                    | 4  |  |
| Salvati M, Cervoni L, Innocenzi G, Bardella L. Prolonged stabilization of multiple and single brain metastases from breast cancer with tamoxifen. Report of three cases. Tumori. 1993                                                                                                                                                                                                                                                                                                                  | Case series                                       | Breast cancer (n = 3)  | Unknown                 | Tamoxifen                            | 4  |  |



|                                                                                                                                                                                                                                                                                                                                                                                                                                                                |                                                   |                                                                                                |                       |             |    |  |
|----------------------------------------------------------------------------------------------------------------------------------------------------------------------------------------------------------------------------------------------------------------------------------------------------------------------------------------------------------------------------------------------------------------------------------------------------------------|---------------------------------------------------|------------------------------------------------------------------------------------------------|-----------------------|-------------|----|--|
| Oct 31;79(5):359-62. PMID: 8116083.                                                                                                                                                                                                                                                                                                                                                                                                                            |                                                   |                                                                                                |                       |             |    |  |
| Tolaney SM, Sahebjam S, Le Rhun E, Bachelot T, Kabos P, Awada A, Yardley D, Chan A, Conte P, Diéras V, Lin NU, Bear M, Chapman SC, Yang Z, Chen Y, Anders CK. A Phase II Study of Abemaciclib in Patients with Brain Metastases Secondary to Hormone Receptor-Positive Breast Cancer. Clin Cancer Res. 2020 Oct 15;26(20):5310-5319. doi: 10.1158/1078-0432.CCR-20-1764. Epub 2020 Jul 21. Erratum in: Clin Cancer Res. 2021 Mar 1;27(5):1582. PMID: 32694159. | Prospective non-randomized phase 2 clinical trial | Breast cancer ( $n = 104$ ; majority of them received previous treatment for brain metastases) | Any form of treatment | Abemaciclib | 2b |  |
